# Supplementary material for: Transplantation of neural precursors generated from spinal progenitor cells reduces inflammation in spinal cord injury via NF-κB pathway inhibition
Source: PubMed Central journal article supplement (PMC6335809; doi:10.1186/s12974-019-1394-7), 2019-01-17

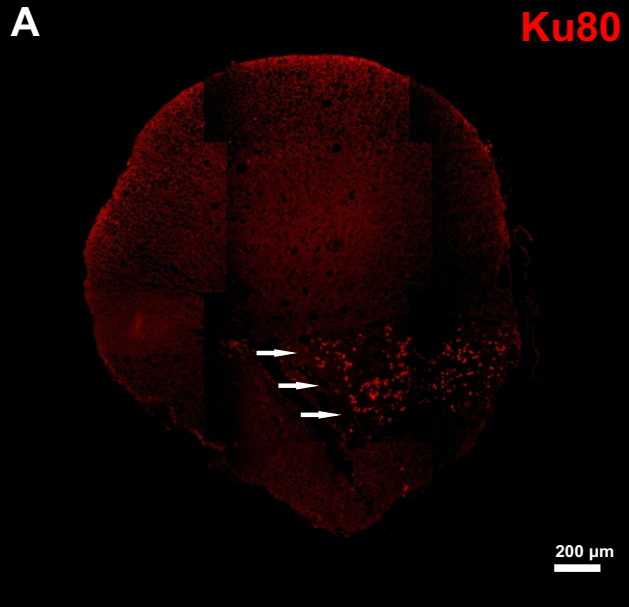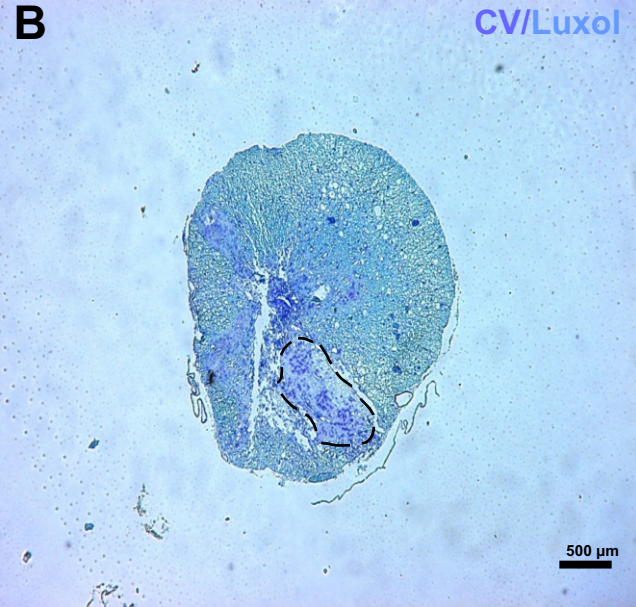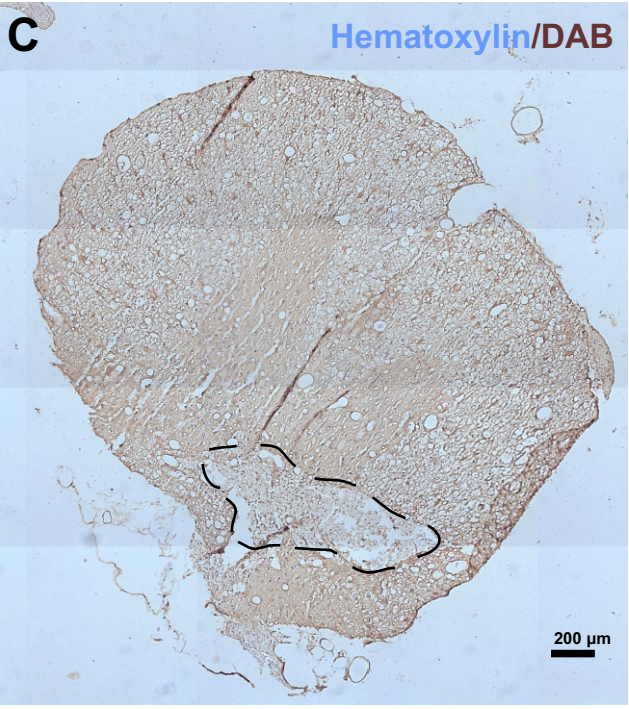

Supplement: 12974_2019_1394_MOESM1_ESM.pdf [file 12974_2019_1394_MOESM1_ESM.pdf]
